# Supplementary material
Source: publisher figshare collection journal article supplement (https://acs.figshare.com/ndownloader/files/4561486)
Supplement: Supplementary file 1 [file 4561486]

data_global
_audit_creation_date                  '2008-09-21' 
_audit_creation_method            SHELXL-97
_publ_contact_author_name         'Dr Ken Tanaka'
_publ_contact_author_address
;
Department of Applied Chemistry
Graduate School of Engineering
Tokyo University of Agriculture and Technology
Koganei
Tokyo 184-8588
Japan
;
_publ_contact_author_email     'tanaka-k@cc.tuat.ac.jp'
_publ_contact_author_fax       '+81-42-388-7037'
_publ_contact_author_phone     '+81-42-388-7037'

loop_
    _publ_author_name
    _publ_author_address
    'Imase, Hidetomo'
;
    Department of Applied Chemistry
    Graduate School of Engineering
    Tokyo University of Agriculture and Technology
    Koganei
    Tokyo 184-8588
    Japan
;
    'Suda, Takeshi'
;
    Department of Applied Chemistry
    Graduate School of Engineering
    Tokyo University of Agriculture and Technology
    Koganei
    Tokyo 184-8588
    Japan
;
    'Noguchi, Keiichi'
;
    Instrumentation Analysis Center
    Tokyo University of Agriculture and Technology
    Koganei
    Tokyo 184-8588
    Japan
;
    'Hirano, Masao'
;
    Department of Applied Chemistry
    Graduate School of Engineering
    Tokyo University of Agriculture and Technology
    Koganei
    Tokyo 184-8588
    Japan
;
    'Tanaka, Ken'
;
    Department of Applied Chemistry
    Graduate School of Engineering
    Tokyo University of Agriculture and Technology
    Koganei
    Tokyo 184-8588
    Japan
;

_journal_name_full 'Journal of the American Chemical Society'

data_I
_chemical_name_systematic
;
 1-(2,2-Dimethylpropyl)-3-bromo-4-(2-methoxynaphthalen-1-yl)-
 5,6,7,8-tetrahydro-1H-quinolin-2-one
;
_chemical_name_common             ?
_chemical_melting_point           ?
_chemical_formula_moiety         'C25 H28 Br N O2, C6 H6'
_chemical_formula_sum            'C31 H34 Br N O2'
_chemical_formula_weight          532.50
_chemical_absolute_configuration       'ad'

loop_
 _atom_type_symbol
 _atom_type_description
 _atom_type_scat_dispersion_real
 _atom_type_scat_dispersion_imag
 _atom_type_scat_source
 'C'  'C'   0.0181   0.0091
 'International Tables Vol C Tables 4.2.6.8 and 6.1.1.4'
 'H'  'H'   0.0000   0.0000
 'International Tables Vol C Tables 4.2.6.8 and 6.1.1.4'
 'O'  'O'   0.0492   0.0322
 'International Tables Vol C Tables 4.2.6.8 and 6.1.1.4'
 'N'  'N'   0.0311   0.0180
 'International Tables Vol C Tables 4.2.6.8 and 6.1.1.4'
 'Br'  'Br'  -0.6763   1.2805
 'International Tables Vol C Tables 4.2.6.8 and 6.1.1.4'
 
_symmetry_cell_setting                 orthorhombic
_symmetry_space_group_name_H-M        'P 21 21 21'
_symmetry_space_group_name_Hall       'P 2ac 2ab'
_symmetry_Int_Tables_number            19
loop_
_symmetry_equiv_pos_site_id
_symmetry_equiv_pos_as_xyz
1   '+X,+Y,+Z'
2   '1/2+X,1/2-Y,-Z'
3   '-X,1/2+Y,1/2-Z'
4   '1/2-X,-Y,1/2+Z'
 
_cell_length_a                    9.15783(17)
_cell_length_b                    17.0989(3)
_cell_length_c                    17.1807(3)
_cell_angle_alpha                 90.00
_cell_angle_beta                  90.00
_cell_angle_gamma                 90.00
_cell_volume                      2690.30(8)
_cell_formula_units_Z             4
_cell_measurement_temperature     193
_cell_measurement_reflns_used          40344
_cell_measurement_theta_min            3.6
_cell_measurement_theta_max            68.3
 
_exptl_crystal_description            'block'
_exptl_crystal_colour                 'colorless'
_exptl_crystal_size_max           0.35
_exptl_crystal_size_mid           0.10
_exptl_crystal_size_min           0.08
_exptl_crystal_density_meas       ?
_exptl_crystal_density_diffrn     1.315
_exptl_crystal_density_method     'not measured'
_exptl_crystal_F_000              1112
_exptl_absorpt_coefficient_mu     2.288
_exptl_absorpt_correction_type         numerical
_exptl_absorpt_process_details         
;
    Higashi, T. (1999). Program for Absorption Correction.
    Rigaku Corporation, Tokyo, Japan.
;
_exptl_absorpt_correction_T_min        0.584
_exptl_absorpt_correction_T_max        0.833
 
_exptl_special_details
;
 ?
;
 
_diffrn_ambient_temperature       193
_diffrn_radiation_wavelength      1.54187
_diffrn_radiation_type            CuK\a
_diffrn_radiation_source          'rotating anode'
_diffrn_radiation_monochromator   graphite
_diffrn_measurement_device_type       'Rigaku RAXIS-RAPID'
_diffrn_measurement_method             \w
_diffrn_detector_area_resol_mean       10.00
_diffrn_reflns_number             47828
_diffrn_reflns_av_R_equivalents   0.0354
_diffrn_reflns_av_sigmaI/netI     0.0241
_diffrn_reflns_limit_h_min        -11
_diffrn_reflns_limit_h_max        11
_diffrn_reflns_limit_k_min        -20
_diffrn_reflns_limit_k_max        20
_diffrn_reflns_limit_l_min        -20
_diffrn_reflns_limit_l_max        20
_diffrn_reflns_theta_min          3.65
_diffrn_reflns_theta_max          68.20
_reflns_number_total              4918
_reflns_number_gt                 4431
_reflns_threshold_expression      >2sigma(I)
 
_computing_data_collection            'PROCESS-AUTO'
_computing_cell_refinement            'PROCESS-AUTO'
_computing_data_reduction             'CrystalStructure'
_computing_structure_solution         'SIR2004'
_computing_structure_refinement   'SHELXL-97 (Sheldrick, 1997)'
_computing_molecular_graphics     ?
_computing_publication_material   'SHELXL-97 (Sheldrick, 1997)'
 
_refine_special_details
;
 Refinement of F^2^ against ALL reflections.  The weighted R-factor wR and
 goodness of fit S are based on F^2^, conventional R-factors R are based
 on F, with F set to zero for negative F^2^. The threshold expression of
 F^2^ > 2sigma(F^2^) is used only for calculating R-factors(gt) etc. and is
 not relevant to the choice of reflections for refinement.  R-factors based
 on F^2^ are statistically about twice as large as those based on F, and R-
 factors based on ALL data will be even larger.
;
 
_refine_ls_structure_factor_coef  Fsqd
_refine_ls_matrix_type            full
_refine_ls_weighting_scheme       calc
_refine_ls_weighting_details
 'calc w=1/[\s^2^(Fo^2^)+(0.0364P)^2^+0.7022P] where P=(Fo^2^+2Fc^2^)/3'
_atom_sites_solution_primary      direct
_atom_sites_solution_secondary    difmap
_atom_sites_solution_hydrogens    difmap
_refine_ls_hydrogen_treatment     constr
_refine_ls_extinction_method      none
_refine_ls_extinction_coef        ?
_refine_ls_abs_structure_details
 'Flack H D (1983), Acta Cryst. A39, 876-881 2127 Friedel Pairs'
_refine_ls_abs_structure_Flack    -0.024(16)
_refine_ls_number_reflns          4918
_refine_ls_number_parameters      308
_refine_ls_number_restraints      48
_refine_ls_R_factor_all           0.0392
_refine_ls_R_factor_gt            0.0338
_refine_ls_wR_factor_ref          0.0855
_refine_ls_wR_factor_gt           0.0801
_refine_ls_goodness_of_fit_ref    1.198
_refine_ls_restrained_S_all       1.193
_refine_ls_shift/su_max           0.001
_refine_ls_shift/su_mean          0.000
 
loop_
 _atom_site_label
 _atom_site_type_symbol
 _atom_site_fract_x
 _atom_site_fract_y
 _atom_site_fract_z
 _atom_site_U_iso_or_equiv
 _atom_site_adp_type
 _atom_site_occupancy
 _atom_site_symmetry_multiplicity
 _atom_site_calc_flag
 _atom_site_refinement_flags
 _atom_site_disorder_assembly
 _atom_site_disorder_group
Br1 Br 0.20804(3) 0.06420(2) 0.590269(19) 0.05404(11) Uani 1 1 d . . .
O1 O 0.4623(3) -0.07988(12) 0.67863(14) 0.0610(6) Uani 1 1 d . . .
O2 O 0.4043(2) 0.15585(11) 0.48270(10) 0.0399(4) Uani 1 1 d . . .
N1 N 0.6147(3) 0.15821(13) 0.55487(12) 0.0352(5) Uani 1 1 d . . .
C1 C 0.3965(3) 0.03764(16) 0.73934(16) 0.0395(6) Uani 1 1 d . . .
C2 C 0.3919(3) -0.04294(17) 0.73940(17) 0.0442(7) Uani 1 1 d . . .
C3 C 0.3215(3) -0.08438(18) 0.7988(2) 0.0522(8) Uani 1 1 d . . .
H3 H 0.3205 -0.1399 0.7981 0.063 Uiso 1 1 calc R . .
C4 C 0.2544(3) -0.04499(19) 0.85775(19) 0.0530(9) Uani 1 1 d . . .
H4 H 0.2088 -0.0736 0.8985 0.064 Uiso 1 1 calc R . .
C5 C 0.2512(3) 0.03715(19) 0.85942(17) 0.0456(8) Uani 1 1 d . . .
C6 C 0.1749(3) 0.0784(2) 0.91701(19) 0.0570(8) Uani 1 1 d . . .
H6 H 0.1279 0.0503 0.9576 0.068 Uiso 1 1 calc R . .
C7 C 0.1668(4) 0.1577(2) 0.9159(2) 0.0623(9) Uani 1 1 d . . .
H7 H 0.1137 0.1846 0.9551 0.075 Uiso 1 1 calc R . .
C8 C 0.2377(4) 0.2001(2) 0.85612(19) 0.0571(9) Uani 1 1 d . . .
H8 H 0.2314 0.2555 0.8552 0.069 Uiso 1 1 calc R . .
C9 C 0.3160(3) 0.16177(17) 0.79908(17) 0.0456(7) Uani 1 1 d . . .
H9 H 0.3653 0.1909 0.7600 0.055 Uiso 1 1 calc R . .
C10 C 0.3231(3) 0.07926(16) 0.79871(16) 0.0404(7) Uani 1 1 d . . .
C11 C 0.4324(5) -0.16032(19) 0.6657(2) 0.0715(11) Uani 1 1 d . . .
H11A H 0.4876 -0.1786 0.6203 0.086 Uiso 1 1 calc R . .
H11B H 0.3277 -0.1673 0.6562 0.086 Uiso 1 1 calc R . .
H11C H 0.4612 -0.1906 0.7116 0.086 Uiso 1 1 calc R . .
C12 C 0.4729(3) 0.08051(16) 0.67520(16) 0.0376(6) Uani 1 1 d . . .
C13 C 0.4030(3) 0.09608(16) 0.60705(15) 0.0373(6) Uani 1 1 d . . .
C14 C 0.4686(3) 0.13776(15) 0.54378(15) 0.0350(6) Uani 1 1 d . . .
C15 C 0.6851(3) 0.14907(16) 0.62591(15) 0.0380(6) Uani 1 1 d . . .
C16 C 0.8328(3) 0.1866(2) 0.63547(17) 0.0494(8) Uani 1 1 d . . .
H16A H 0.8282 0.2411 0.6161 0.059 Uiso 1 1 calc R . .
H16B H 0.9047 0.1580 0.6032 0.059 Uiso 1 1 calc R . .
C17 C 0.8853(4) 0.1872(2) 0.72001(19) 0.0625(10) Uani 1 1 d . . .
H17A H 0.9911 0.1989 0.7215 0.075 Uiso 1 1 calc R . .
H17B H 0.8336 0.2288 0.7491 0.075 Uiso 1 1 calc R . .
C18 C 0.8575(4) 0.1096(2) 0.7582(2) 0.0646(10) Uani 1 1 d . . .
H18A H 0.8994 0.1095 0.8113 0.078 Uiso 1 1 calc R . .
H18B H 0.9053 0.0675 0.7279 0.078 Uiso 1 1 calc R . .
C19 C 0.6941(4) 0.0947(2) 0.76236(17) 0.0517(8) Uani 1 1 d . . .
H19A H 0.6508 0.1293 0.8025 0.062 Uiso 1 1 calc R . .
H19B H 0.6771 0.0399 0.7786 0.062 Uiso 1 1 calc R . .
C20 C 0.6178(3) 0.10909(17) 0.68529(16) 0.0389(6) Uani 1 1 d . . .
C21 C 0.6856(3) 0.19472(16) 0.48629(15) 0.0381(6) Uani 1 1 d . . .
H21A H 0.7628 0.2306 0.5051 0.046 Uiso 1 1 calc R . .
H21B H 0.6118 0.2268 0.4588 0.046 Uiso 1 1 calc R . .
C22 C 0.7544(3) 0.13761(17) 0.42703(15) 0.0415(7) Uani 1 1 d . . .
C23 C 0.8876(4) 0.0960(2) 0.4605(2) 0.0588(9) Uani 1 1 d . . .
H23A H 0.8578 0.0638 0.5050 0.071 Uiso 1 1 calc R . .
H23B H 0.9595 0.1348 0.4776 0.071 Uiso 1 1 calc R . .
H23C H 0.9311 0.0625 0.4204 0.071 Uiso 1 1 calc R . .
C24 C 0.6459(4) 0.07708(19) 0.3976(2) 0.0554(8) Uani 1 1 d . . .
H24A H 0.6124 0.0448 0.4412 0.066 Uiso 1 1 calc R . .
H24B H 0.6932 0.0438 0.3586 0.066 Uiso 1 1 calc R . .
H24C H 0.5621 0.1037 0.3740 0.066 Uiso 1 1 calc R . .
C25 C 0.8039(4) 0.1878(2) 0.35812(17) 0.0595(8) Uani 1 1 d . . .
H25A H 0.8489 0.1544 0.3185 0.071 Uiso 1 1 calc R . .
H25B H 0.8751 0.2266 0.3761 0.071 Uiso 1 1 calc R . .
H25C H 0.7193 0.2147 0.3357 0.071 Uiso 1 1 calc R . .
C26 C 0.0412(4) 0.39931(19) 0.87553(18) 0.1027(16) Uani 1 1 d GU . .
H26 H -0.0151 0.4060 0.8296 0.123 Uiso 1 1 calc R . .
C27 C 0.1870(4) 0.42179(16) 0.87668(17) 0.0920(14) Uani 1 1 d GU . .
H27 H 0.2304 0.4438 0.8315 0.110 Uiso 1 1 calc R . .
C28 C 0.2694(3) 0.41205(17) 0.9439(2) 0.0966(15) Uani 1 1 d GU . .
H28 H 0.3690 0.4274 0.9447 0.116 Uiso 1 1 calc R . .
C29 C 0.2059(4) 0.37982(18) 1.01006(15) 0.0950(13) Uani 1 1 d GU . .
H29 H 0.2622 0.3732 1.0560 0.114 Uiso 1 1 calc R . .
C30 C 0.0600(4) 0.35734(18) 1.00891(17) 0.0917(14) Uani 1 1 d GU . .
H30 H 0.0166 0.3353 1.0541 0.110 Uiso 1 1 calc R . .
C31 C -0.0223(3) 0.3671(2) 0.9417(2) 0.1053(16) Uani 1 1 d GU . .
H31 H -0.1220 0.3517 0.9409 0.126 Uiso 1 1 calc R . .
 
loop_
 _atom_site_aniso_label
 _atom_site_aniso_U_11
 _atom_site_aniso_U_22
 _atom_site_aniso_U_33
 _atom_site_aniso_U_23
 _atom_site_aniso_U_13
 _atom_site_aniso_U_12
Br1 0.03258(16) 0.0778(2) 0.05176(17) 0.00391(17) -0.00418(15) -0.01083(17)
O1 0.0663(16) 0.0443(13) 0.0723(15) -0.0027(11) 0.0158(13) -0.0022(11)
O2 0.0372(11) 0.0469(11) 0.0356(10) -0.0006(8) -0.0059(9) 0.0036(9)
N1 0.0349(13) 0.0396(12) 0.0312(10) 0.0017(9) -0.0015(10) -0.0049(10)
C1 0.0316(15) 0.0447(16) 0.0421(14) 0.0065(12) -0.0025(12) -0.0038(12)
C2 0.0367(17) 0.0453(17) 0.0506(16) 0.0045(13) 0.0016(14) -0.0028(13)
C3 0.0434(19) 0.0492(18) 0.064(2) 0.0152(15) -0.0034(16) -0.0074(14)
C4 0.041(2) 0.064(2) 0.0538(18) 0.0207(16) -0.0007(14) -0.0100(14)
C5 0.0347(17) 0.0604(18) 0.0417(15) 0.0071(13) -0.0018(12) -0.0071(13)
C6 0.0450(18) 0.080(2) 0.0464(17) 0.0042(17) 0.0040(15) -0.0069(16)
C7 0.049(2) 0.084(2) 0.0542(19) -0.0103(19) 0.0042(17) 0.0041(17)
C8 0.053(2) 0.061(2) 0.0570(19) -0.0060(16) -0.0044(16) 0.0076(16)
C9 0.0443(19) 0.0493(16) 0.0432(15) 0.0023(13) -0.0007(14) -0.0013(14)
C10 0.0315(16) 0.0478(17) 0.0419(14) 0.0031(12) -0.0050(12) -0.0022(12)
C11 0.079(3) 0.046(2) 0.090(3) -0.0088(19) 0.000(2) -0.0042(19)
C12 0.0326(15) 0.0411(16) 0.0393(14) 0.0040(11) 0.0003(12) -0.0023(12)
C13 0.0272(14) 0.0449(14) 0.0399(15) 0.0019(11) 0.0021(12) -0.0010(11)
C14 0.0317(15) 0.0366(14) 0.0367(14) -0.0051(11) -0.0007(12) 0.0028(12)
C15 0.0343(16) 0.0444(14) 0.0354(13) 0.0018(11) -0.0026(12) -0.0036(13)
C16 0.042(2) 0.0647(19) 0.0412(16) 0.0062(14) -0.0050(13) -0.0150(15)
C17 0.046(2) 0.091(3) 0.0502(18) 0.0104(18) -0.0105(16) -0.0224(19)
C18 0.048(2) 0.092(3) 0.053(2) 0.0177(19) -0.0200(17) -0.013(2)
C19 0.0435(18) 0.071(2) 0.0408(15) 0.0182(14) -0.0095(15) -0.0070(17)
C20 0.0334(15) 0.0471(16) 0.0361(14) 0.0051(12) -0.0046(13) -0.0010(13)
C21 0.0393(17) 0.0405(15) 0.0345(13) 0.0043(11) 0.0014(12) -0.0049(13)
C22 0.0355(16) 0.0494(16) 0.0395(15) 0.0018(12) 0.0062(11) -0.0009(12)
C23 0.045(2) 0.073(2) 0.058(2) 0.0048(16) 0.0059(17) 0.0083(17)
C24 0.0478(18) 0.0568(18) 0.062(2) -0.0204(16) 0.0117(15) -0.0033(15)
C25 0.064(2) 0.072(2) 0.0430(16) 0.0084(15) 0.0117(17) -0.004(2)
C26 0.097(4) 0.107(4) 0.104(3) 0.014(3) 0.018(3) 0.047(3)
C27 0.112(4) 0.059(2) 0.106(3) -0.003(2) 0.045(3) 0.020(3)
C28 0.107(4) 0.079(3) 0.104(3) -0.038(2) 0.043(3) -0.016(3)
C29 0.101(3) 0.101(3) 0.083(3) -0.025(2) 0.020(3) -0.006(3)
C30 0.093(3) 0.087(3) 0.095(3) -0.008(3) 0.036(3) -0.003(3)
C31 0.068(3) 0.124(4) 0.124(4) 0.001(3) 0.028(3) 0.014(3)
 
_geom_special_details
;
 All esds (except the esd in the dihedral angle between two l.s. planes)
 are estimated using the full covariance matrix.  The cell esds are taken
 into account individually in the estimation of esds in distances, angles
 and torsion angles; correlations between esds in cell parameters are only
 used when they are defined by crystal symmetry.  An approximate (isotropic)
 treatment of cell esds is used for estimating esds involving l.s. planes.
;
 
loop_
 _geom_bond_atom_site_label_1
 _geom_bond_atom_site_label_2
 _geom_bond_distance
 _geom_bond_site_symmetry_2
 _geom_bond_publ_flag
Br1 C13 1.889(3) . ?
O1 C2 1.380(4) . ?
O1 C11 1.420(4) . ?
O2 C14 1.242(3) . ?
N1 C15 1.389(3) . ?
N1 C14 1.396(4) . ?
N1 C21 1.483(3) . ?
C1 C2 1.379(4) . ?
C1 C10 1.414(4) . ?
C1 C12 1.497(4) . ?
C2 C3 1.400(4) . ?
C3 C4 1.362(5) . ?
C3 H3 0.9500 . ?
C4 C5 1.405(4) . ?
C4 H4 0.9500 . ?
C5 C6 1.402(4) . ?
C5 C10 1.428(4) . ?
C6 C7 1.359(5) . ?
C6 H6 0.9500 . ?
C7 C8 1.415(5) . ?
C7 H7 0.9500 . ?
C8 C9 1.380(4) . ?
C8 H8 0.9500 . ?
C9 C10 1.412(4) . ?
C9 H9 0.9500 . ?
C11 H11A 0.9800 . ?
C11 H11B 0.9800 . ?
C11 H11C 0.9800 . ?
C12 C13 1.360(4) . ?
C12 C20 1.425(4) . ?
C13 C14 1.432(4) . ?
C15 C20 1.374(4) . ?
C15 C16 1.506(4) . ?
C16 C17 1.530(4) . ?
C16 H16A 0.9900 . ?
C16 H16B 0.9900 . ?
C17 C18 1.502(5) . ?
C17 H17A 0.9900 . ?
C17 H17B 0.9900 . ?
C18 C19 1.520(5) . ?
C18 H18A 0.9900 . ?
C18 H18B 0.9900 . ?
C19 C20 1.517(4) . ?
C19 H19A 0.9900 . ?
C19 H19B 0.9900 . ?
C21 C22 1.545(4) . ?
C21 H21A 0.9900 . ?
C21 H21B 0.9900 . ?
C22 C24 1.522(4) . ?
C22 C23 1.525(4) . ?
C22 C25 1.531(4) . ?
C23 H23A 0.9800 . ?
C23 H23B 0.9800 . ?
C23 H23C 0.9800 . ?
C24 H24A 0.9800 . ?
C24 H24B 0.9800 . ?
C24 H24C 0.9800 . ?
C25 H25A 0.9800 . ?
C25 H25B 0.9800 . ?
C25 H25C 0.9800 . ?
C26 C27 1.3900 . ?
C26 C31 1.3900 . ?
C26 H26 0.9500 . ?
C27 C28 1.3900 . ?
C27 H27 0.9500 . ?
C28 C29 1.3900 . ?
C28 H28 0.9500 . ?
C29 C30 1.3900 . ?
C29 H29 0.9500 . ?
C30 C31 1.3900 . ?
C30 H30 0.9500 . ?
C31 H31 0.9500 . ?
 
loop_
 _geom_angle_atom_site_label_1
 _geom_angle_atom_site_label_2
 _geom_angle_atom_site_label_3
 _geom_angle
 _geom_angle_site_symmetry_1
 _geom_angle_site_symmetry_3
 _geom_angle_publ_flag
C2 O1 C11 118.1(3) . . ?
C15 N1 C14 122.4(2) . . ?
C15 N1 C21 122.8(2) . . ?
C14 N1 C21 114.6(2) . . ?
C2 C1 C10 119.2(3) . . ?
C2 C1 C12 120.3(3) . . ?
C10 C1 C12 120.5(2) . . ?
C1 C2 O1 116.3(3) . . ?
C1 C2 C3 121.4(3) . . ?
O1 C2 C3 122.4(3) . . ?
C4 C3 C2 120.0(3) . . ?
C4 C3 H3 120.0 . . ?
C2 C3 H3 120.0 . . ?
C3 C4 C5 121.2(3) . . ?
C3 C4 H4 119.4 . . ?
C5 C4 H4 119.4 . . ?
C4 C5 C6 121.8(3) . . ?
C4 C5 C10 118.7(3) . . ?
C6 C5 C10 119.5(3) . . ?
C7 C6 C5 121.3(3) . . ?
C7 C6 H6 119.3 . . ?
C5 C6 H6 119.3 . . ?
C6 C7 C8 119.7(3) . . ?
C6 C7 H7 120.1 . . ?
C8 C7 H7 120.1 . . ?
C9 C8 C7 120.7(3) . . ?
C9 C8 H8 119.6 . . ?
C7 C8 H8 119.6 . . ?
C8 C9 C10 120.1(3) . . ?
C8 C9 H9 120.0 . . ?
C10 C9 H9 120.0 . . ?
C1 C10 C9 121.8(3) . . ?
C1 C10 C5 119.5(3) . . ?
C9 C10 C5 118.6(3) . . ?
O1 C11 H11A 109.5 . . ?
O1 C11 H11B 109.5 . . ?
H11A C11 H11B 109.5 . . ?
O1 C11 H11C 109.5 . . ?
H11A C11 H11C 109.5 . . ?
H11B C11 H11C 109.5 . . ?
C13 C12 C20 118.4(2) . . ?
C13 C12 C1 120.7(2) . . ?
C20 C12 C1 120.9(2) . . ?
C12 C13 C14 123.6(3) . . ?
C12 C13 Br1 121.3(2) . . ?
C14 C13 Br1 115.1(2) . . ?
O2 C14 N1 120.5(2) . . ?
O2 C14 C13 124.5(3) . . ?
N1 C14 C13 115.0(2) . . ?
C20 C15 N1 120.0(3) . . ?
C20 C15 C16 122.3(3) . . ?
N1 C15 C16 117.7(2) . . ?
C15 C16 C17 112.9(3) . . ?
C15 C16 H16A 109.0 . . ?
C17 C16 H16A 109.0 . . ?
C15 C16 H16B 109.0 . . ?
C17 C16 H16B 109.0 . . ?
H16A C16 H16B 107.8 . . ?
C18 C17 C16 110.8(3) . . ?
C18 C17 H17A 109.5 . . ?
C16 C17 H17A 109.5 . . ?
C18 C17 H17B 109.5 . . ?
C16 C17 H17B 109.5 . . ?
H17A C17 H17B 108.1 . . ?
C17 C18 C19 109.6(3) . . ?
C17 C18 H18A 109.8 . . ?
C19 C18 H18A 109.8 . . ?
C17 C18 H18B 109.8 . . ?
C19 C18 H18B 109.8 . . ?
H18A C18 H18B 108.2 . . ?
C18 C19 C20 112.7(3) . . ?
C18 C19 H19A 109.1 . . ?
C20 C19 H19A 109.1 . . ?
C18 C19 H19B 109.1 . . ?
C20 C19 H19B 109.1 . . ?
H19A C19 H19B 107.8 . . ?
C15 C20 C12 119.9(2) . . ?
C15 C20 C19 121.5(3) . . ?
C12 C20 C19 118.7(2) . . ?
N1 C21 C22 115.8(2) . . ?
N1 C21 H21A 108.3 . . ?
C22 C21 H21A 108.3 . . ?
N1 C21 H21B 108.3 . . ?
C22 C21 H21B 108.3 . . ?
H21A C21 H21B 107.4 . . ?
C24 C22 C23 109.3(3) . . ?
C24 C22 C25 108.5(3) . . ?
C23 C22 C25 108.5(3) . . ?
C24 C22 C21 112.5(2) . . ?
C23 C22 C21 111.9(2) . . ?
C25 C22 C21 106.0(2) . . ?
C22 C23 H23A 109.5 . . ?
C22 C23 H23B 109.5 . . ?
H23A C23 H23B 109.5 . . ?
C22 C23 H23C 109.5 . . ?
H23A C23 H23C 109.5 . . ?
H23B C23 H23C 109.5 . . ?
C22 C24 H24A 109.5 . . ?
C22 C24 H24B 109.5 . . ?
H24A C24 H24B 109.5 . . ?
C22 C24 H24C 109.5 . . ?
H24A C24 H24C 109.5 . . ?
H24B C24 H24C 109.5 . . ?
C22 C25 H25A 109.5 . . ?
C22 C25 H25B 109.5 . . ?
H25A C25 H25B 109.5 . . ?
C22 C25 H25C 109.5 . . ?
H25A C25 H25C 109.5 . . ?
H25B C25 H25C 109.5 . . ?
C27 C26 C31 120.0 . . ?
C27 C26 H26 120.0 . . ?
C31 C26 H26 120.0 . . ?
C28 C27 C26 120.0 . . ?
C28 C27 H27 120.0 . . ?
C26 C27 H27 120.0 . . ?
C29 C28 C27 120.0 . . ?
C29 C28 H28 120.0 . . ?
C27 C28 H28 120.0 . . ?
C28 C29 C30 120.0 . . ?
C28 C29 H29 120.0 . . ?
C30 C29 H29 120.0 . . ?
C31 C30 C29 120.0 . . ?
C31 C30 H30 120.0 . . ?
C29 C30 H30 120.0 . . ?
C30 C31 C26 120.0 . . ?
C30 C31 H31 120.0 . . ?
C26 C31 H31 120.0 . . ?
 
loop_
 _geom_torsion_atom_site_label_1
 _geom_torsion_atom_site_label_2
 _geom_torsion_atom_site_label_3
 _geom_torsion_atom_site_label_4
 _geom_torsion
 _geom_torsion_site_symmetry_1
 _geom_torsion_site_symmetry_2
 _geom_torsion_site_symmetry_3
 _geom_torsion_site_symmetry_4
 _geom_torsion_publ_flag
C10 C1 C2 O1 178.2(3) . . . . ?
C12 C1 C2 O1 0.9(4) . . . . ?
C10 C1 C2 C3 -2.8(5) . . . . ?
C12 C1 C2 C3 179.9(3) . . . . ?
C11 O1 C2 C1 -165.4(3) . . . . ?
C11 O1 C2 C3 15.7(5) . . . . ?
C1 C2 C3 C4 0.7(5) . . . . ?
O1 C2 C3 C4 179.6(3) . . . . ?
C2 C3 C4 C5 1.5(5) . . . . ?
C3 C4 C5 C6 176.0(3) . . . . ?
C3 C4 C5 C10 -1.4(5) . . . . ?
C4 C5 C6 C7 -176.8(3) . . . . ?
C10 C5 C6 C7 0.6(5) . . . . ?
C5 C6 C7 C8 -0.7(5) . . . . ?
C6 C7 C8 C9 -0.4(5) . . . . ?
C7 C8 C9 C10 1.6(5) . . . . ?
C2 C1 C10 C9 -175.9(3) . . . . ?
C12 C1 C10 C9 1.4(4) . . . . ?
C2 C1 C10 C5 2.8(4) . . . . ?
C12 C1 C10 C5 -179.9(3) . . . . ?
C8 C9 C10 C1 177.1(3) . . . . ?
C8 C9 C10 C5 -1.7(4) . . . . ?
C4 C5 C10 C1 -0.7(4) . . . . ?
C6 C5 C10 C1 -178.2(3) . . . . ?
C4 C5 C10 C9 178.1(3) . . . . ?
C6 C5 C10 C9 0.6(4) . . . . ?
C2 C1 C12 C13 84.2(4) . . . . ?
C10 C1 C12 C13 -93.1(3) . . . . ?
C2 C1 C12 C20 -98.7(3) . . . . ?
C10 C1 C12 C20 84.0(3) . . . . ?
C20 C12 C13 C14 1.9(4) . . . . ?
C1 C12 C13 C14 179.1(3) . . . . ?
C20 C12 C13 Br1 -177.4(2) . . . . ?
C1 C12 C13 Br1 -0.2(4) . . . . ?
C15 N1 C14 O2 170.8(2) . . . . ?
C21 N1 C14 O2 -5.7(3) . . . . ?
C15 N1 C14 C13 -8.9(4) . . . . ?
C21 N1 C14 C13 174.6(2) . . . . ?
C12 C13 C14 O2 -176.3(3) . . . . ?
Br1 C13 C14 O2 3.0(4) . . . . ?
C12 C13 C14 N1 3.4(4) . . . . ?
Br1 C13 C14 N1 -177.25(18) . . . . ?
C14 N1 C15 C20 9.1(4) . . . . ?
C21 N1 C15 C20 -174.7(3) . . . . ?
C14 N1 C15 C16 -168.8(3) . . . . ?
C21 N1 C15 C16 7.4(4) . . . . ?
C20 C15 C16 C17 -9.7(4) . . . . ?
N1 C15 C16 C17 168.2(3) . . . . ?
C15 C16 C17 C18 44.0(4) . . . . ?
C16 C17 C18 C19 -64.1(4) . . . . ?
C17 C18 C19 C20 48.5(4) . . . . ?
N1 C15 C20 C12 -3.2(4) . . . . ?
C16 C15 C20 C12 174.6(3) . . . . ?
N1 C15 C20 C19 177.1(3) . . . . ?
C16 C15 C20 C19 -5.1(5) . . . . ?
C13 C12 C20 C15 -2.1(4) . . . . ?
C1 C12 C20 C15 -179.3(3) . . . . ?
C13 C12 C20 C19 177.6(3) . . . . ?
C1 C12 C20 C19 0.4(4) . . . . ?
C18 C19 C20 C15 -14.7(5) . . . . ?
C18 C19 C20 C12 165.6(3) . . . . ?
C15 N1 C21 C22 96.2(3) . . . . ?
C14 N1 C21 C22 -87.3(3) . . . . ?
N1 C21 C22 C24 55.2(3) . . . . ?
N1 C21 C22 C23 -68.3(3) . . . . ?
N1 C21 C22 C25 173.6(2) . . . . ?
C31 C26 C27 C28 0.0 . . . . ?
C26 C27 C28 C29 0.0 . . . . ?
C27 C28 C29 C30 0.0 . . . . ?
C28 C29 C30 C31 0.0 . . . . ?
C29 C30 C31 C26 0.0 . . . . ?
C27 C26 C31 C30 0.0 . . . . ?
 
_diffrn_measured_fraction_theta_max    1.000
_diffrn_reflns_theta_full              68.20
_diffrn_measured_fraction_theta_full   1.000
_refine_diff_density_max    0.193
_refine_diff_density_min   -0.478
_refine_diff_density_rms    0.054
